# Supplementary material
Source: HighWire-hosted journal article supplement (https://rmdopen.bmj.com/content/8/2/e002476)

**Supplemental figure 1: Propensity score density for the overall population (A) and the MPA-eligible subgroup (B).**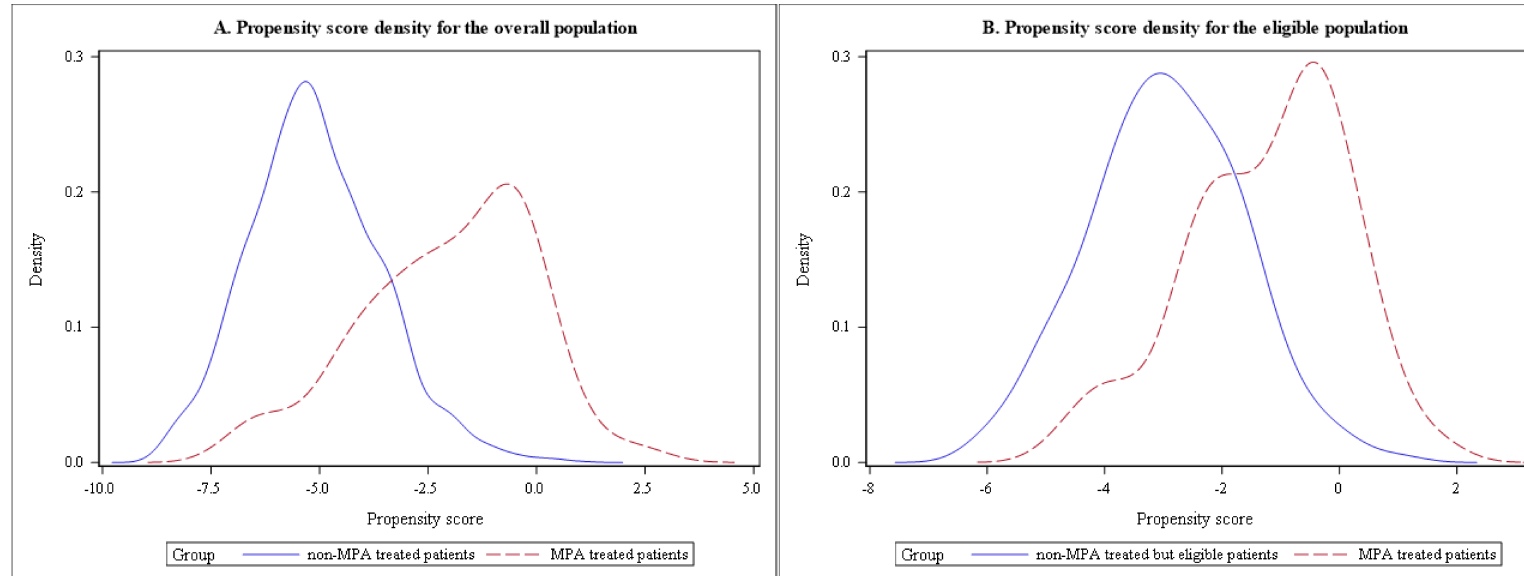

Supplement: inline-supplementary-material-1 [file inline-supplementary-material-1.pdf]
